# Supplementary material for: Diagnostic fragmentations of adducts formed between carbanions and carbon disulfide in the gas phase. A joint experimental and theoretical study
Source: Royal Society of Chemistry journal article supplement (doi:10.1039/b916477d), 2009-10-23
Supplement: b916477d.pdf [file b916477d.pdf]

## **Supplementary Data**

**Diagnostic fragmentations of adducts formed between  
carbanions and carbon disulfide in the gas phase. A joint  
experimental and theoretical study.**

Micheal J. Maclean, Scott Walker, Tianfang Wang,  
Peter C.H. Eichinger, and John H. Bowie.\*

Department of Chemistry, The University of Adelaide, South  
Australia, 5005.

**Table 1**  
**Reaction Pathway for the CS<sub>2</sub> Addition to the Singlet Phenyl Anion. Anion Geometries and Energies. Carbon-Sulfur Skeleton Only.**

Level of theory used - UCCSD(T)/6-31+G(d,p)//B3LYP/6-31+G(d,p).

Relative energies in kJ mol<sup>-1</sup> with respect to a+CS<sub>2</sub> (0 kJ mol<sup>-1</sup>).

|                                                             | 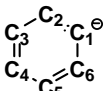 |  |  |  |  |
|-------------------------------------------------------------|-----------------------------------------------------------------------------------|-----------------------------------------------------------------------------------|------------------------------------------------------------------------------------|-------------------------------------------------------------------------------------|-------------------------------------------------------------------------------------|
|                                                             | <b>A</b>                                                                          | <b>B</b>                                                                          | <b>TSB/C</b>                                                                       | <b>C</b>                                                                            | <b>D</b>                                                                            |
| <b>State</b>                                                | <sup>1</sup> A <sub>1</sub>                                                       | <sup>1</sup> A                                                                    | <sup>1</sup> A                                                                     | <sup>1</sup> A'                                                                     | <sup>1</sup> A'                                                                     |
| <b>Symmetry</b>                                             | C <sub>2v</sub>                                                                   | C <sub>1</sub>                                                                    | C <sub>1</sub>                                                                     | C <sub>s</sub>                                                                      | C <sub>s</sub>                                                                      |
| <b>Energy (Hartrees)</b>                                    | -230.85327 [-1064.1525]                                                           | -1064.26773                                                                       | -1064.14790                                                                        | -1064.19111                                                                         | -628.60034 [-1064.17814]                                                            |
| <b>Energy Relative to a+CS<sub>2</sub></b>                  | 0 [A+CS <sub>2</sub> ]                                                            | -303                                                                              | +12                                                                                | -101                                                                                | -68 [D+CS]                                                                          |
| <b>Gibbs Free Energy</b>                                    | -230.8801 [-1064.19975]                                                           | -1064.30188                                                                       | -1064.181691                                                                       | -1064.22630                                                                         | -628.63016 [-1064.22854]                                                            |
| <b>Free Energy Relative to a+CS<sub>2</sub></b>             | 0 [A+CS <sub>2</sub> ]                                                            | -268                                                                              | +47                                                                                | -70                                                                                 | -76 [D+CS]                                                                          |
| <b>Bond Lengths (Å)</b>                                     |                                                                                   |                                                                                   |                                                                                    |                                                                                     |                                                                                     |
| C <sub>1</sub> S <sub>1</sub>                               | -                                                                                 | -                                                                                 | 3.019                                                                              | 1.791                                                                               | 1.750                                                                               |
| C <sub>1</sub> C <sub>2</sub>                               | 1.421                                                                             | 1.407                                                                             | 1.440                                                                              | 1.405                                                                               | 1.424                                                                               |
| C <sub>1</sub> C <sub>7</sub>                               | -                                                                                 | 1.512                                                                             | 1.491                                                                              | -                                                                                   | -                                                                                   |
| C <sub>2</sub> C <sub>3</sub>                               | 1.407                                                                             | 1.396                                                                             | 1.388                                                                              | 1.396                                                                               | 1.395                                                                               |
| C <sub>3</sub> C <sub>4</sub>                               | 1.402                                                                             | 1.400                                                                             | 1.405                                                                              | 1.401                                                                               | 1.403                                                                               |
| C <sub>4</sub> C <sub>5</sub>                               | 1.401                                                                             | 1.398                                                                             | 1.405                                                                              | 1.399                                                                               | 1.403                                                                               |
| C <sub>5</sub> C <sub>6</sub>                               | 1.407                                                                             | 1.397                                                                             | 1.387                                                                              | 1.397                                                                               | 1.394                                                                               |
| C <sub>6</sub> C <sub>1</sub>                               | 1.422                                                                             | 1.408                                                                             | 1.441                                                                              | 1.407                                                                               | 1.424                                                                               |
| C <sub>7</sub> S <sub>1</sub>                               | -                                                                                 | 1.706                                                                             | 1.937                                                                              | 1.823                                                                               | -                                                                                   |
| C <sub>7</sub> S <sub>2</sub>                               | -                                                                                 | 1.705                                                                             | 1.654                                                                              | 1.682                                                                               | -                                                                                   |
| <b>Bond Angles (°)</b>                                      |                                                                                   |                                                                                   |                                                                                    |                                                                                     |                                                                                     |
| S <sub>1</sub> C <sub>7</sub> S <sub>2</sub>                | -                                                                                 | 125.5                                                                             | 104.4                                                                              | 112.4                                                                               | -                                                                                   |
| S <sub>1</sub> C <sub>1</sub> C <sub>2</sub>                | -                                                                                 | -                                                                                 | -                                                                                  | 123.0                                                                               | 122.4                                                                               |
| S <sub>1</sub> C <sub>1</sub> C <sub>6</sub>                | -                                                                                 | -                                                                                 | -                                                                                  | 118.4                                                                               | 122.3                                                                               |
| S <sub>1</sub> C <sub>7</sub> C <sub>1</sub>                | -                                                                                 | 117.2                                                                             | 75.6                                                                               | -                                                                                   | -                                                                                   |
| S <sub>2</sub> C <sub>7</sub> C <sub>1</sub>                | -                                                                                 | 117.2                                                                             | 180.0                                                                              | -                                                                                   | -                                                                                   |
| C <sub>1</sub> C <sub>2</sub> C <sub>3</sub>                | 125.0                                                                             | 121.3                                                                             | 120.9                                                                              | 120.3                                                                               | 122.3                                                                               |
| C <sub>2</sub> C <sub>3</sub> C <sub>4</sub>                | 119.9                                                                             | 120.4                                                                             | 121.7                                                                              | 121.0                                                                               | 121.0                                                                               |
| C <sub>3</sub> C <sub>4</sub> C <sub>5</sub>                | 118.2                                                                             | 119.0                                                                             | 117.5                                                                              | 118.9                                                                               | 118.0                                                                               |
| C <sub>4</sub> C <sub>5</sub> C <sub>6</sub>                | 119.9                                                                             | 120.5                                                                             | 121.8                                                                              | 120.5                                                                               | 121.0                                                                               |
| C <sub>5</sub> C <sub>6</sub> C <sub>1</sub>                | 124.9                                                                             | 121.2                                                                             | 120.8                                                                              | 120.8                                                                               | 122.3                                                                               |
| C <sub>6</sub> C <sub>1</sub> C <sub>2</sub>                | 112.0                                                                             | 117.6                                                                             | 115.1                                                                              | 118.6                                                                               | 115.3                                                                               |
| C <sub>7</sub> C <sub>1</sub> C <sub>2</sub>                | -                                                                                 | 121.2                                                                             | 120.0                                                                              | -                                                                                   | -                                                                                   |
| C <sub>7</sub> S <sub>1</sub> C <sub>1</sub>                | -                                                                                 | -                                                                                 | 56.7                                                                               | 103.4                                                                               | -                                                                                   |
| <b>Dihedral Angle (°)</b>                                   |                                                                                   |                                                                                   |                                                                                    |                                                                                     |                                                                                     |
| C <sub>1</sub> C <sub>2</sub> C <sub>3</sub> C <sub>4</sub> | 0.0                                                                               | 1.5                                                                               | -7.2                                                                               | 0.0                                                                                 | 0.0                                                                                 |
| S <sub>1</sub> C <sub>1</sub> C <sub>2</sub> C <sub>3</sub> | -                                                                                 | -                                                                                 | -118.6                                                                             | 180.0                                                                               | 180.0                                                                               |
| C <sub>2</sub> C <sub>3</sub> C <sub>4</sub> C <sub>5</sub> | 0.0                                                                               | -0.8                                                                              | -2.6                                                                               | 0.0                                                                                 | -0.316                                                                              |
| S <sub>2</sub> C <sub>7</sub> S <sub>1</sub> C <sub>1</sub> | -                                                                                 | -                                                                                 | 180.0                                                                              | -                                                                                   | -                                                                                   |

**Table 1(a)**  
**Reaction Pathway for the CS<sub>2</sub> Addition to the Singlet Phenyl Anion. Anion Geometries and Energies. C-H Only.**

Level of theory used - UCCSD(T)/6-31+G(d,p)//B3LYP/6-31+G(d,p).

Relative energies in kJ mol<sup>-1</sup> with respect to a+CS<sub>2</sub> (0 kJ mol<sup>-1</sup>).

|                                               | 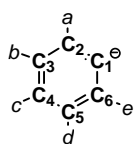 |  |  |  |  |
|-----------------------------------------------|-----------------------------------------------------------------------------------|-----------------------------------------------------------------------------------|-----------------------------------------------------------------------------------|-------------------------------------------------------------------------------------|-------------------------------------------------------------------------------------|
|                                               | <b>A</b>                                                                          | <b>B</b>                                                                          | <b>TSB/C</b>                                                                      | <b>C</b>                                                                            | <b>D</b>                                                                            |
| State                                         | <sup>1</sup> A <sub>1</sub>                                                       | <sup>1</sup> A                                                                    | <sup>1</sup> A                                                                    | <sup>1</sup> A'                                                                     | <sup>1</sup> A'                                                                     |
| Symmetry                                      | C <sub>2v</sub>                                                                   | C <sub>1</sub>                                                                    | C <sub>1</sub>                                                                    | C <sub>s</sub>                                                                      | C <sub>s</sub>                                                                      |
| Energy (Hartrees)                             | -230.85327 [-1064.1525]                                                           | -1064.26773                                                                       | -1064.14790                                                                       | -1064.19111                                                                         | -628.60034 [-1064.17814]                                                            |
| Energy Relative to a+CS <sub>2</sub>          | 0 [A+CS <sub>2</sub> ]                                                            | -303                                                                              | +12                                                                               | -101                                                                                | -68 [D+CS]                                                                          |
| Gibbs Free Energy                             | -230.8801 [-1064.19975]                                                           | -1064.30188                                                                       | -1064.181691                                                                      | -1064.22630                                                                         | -628.63016 [-1064.22854]                                                            |
| Free Energy Relative to a+CS <sub>2</sub>     | 0 [A+CS <sub>2</sub> ]                                                            | -268                                                                              | +47                                                                               | -70                                                                                 | -76 [D+CS]                                                                          |
| <b>Bond Lengths (Å)</b>                       |                                                                                   |                                                                                   |                                                                                   |                                                                                     |                                                                                     |
| C <sub>2</sub> a*                             | 1.097                                                                             | 1.085                                                                             | 1.087                                                                             | 1.086                                                                               | 1.087                                                                               |
| C <sub>3</sub> b                              | 1.094                                                                             | 1.088                                                                             | 1.089                                                                             | 1.088                                                                               | 1.090                                                                               |
| C <sub>4</sub> c                              | 1.090                                                                             | 1.087                                                                             | 1.087                                                                             | 1.087                                                                               | 1.088                                                                               |
| C <sub>5</sub> d                              | 1.094                                                                             | 1.089                                                                             | 1.090                                                                             | 1.089                                                                               | 1.090                                                                               |
| C <sub>6</sub> e                              | 1.097                                                                             | 1.084                                                                             | 1.086                                                                             | 1.088                                                                               | 1.087                                                                               |
| <b>Bond Angles (°)</b>                        |                                                                                   |                                                                                   |                                                                                   |                                                                                     |                                                                                     |
| aC <sub>2</sub> C <sub>1</sub>                | 118.9                                                                             | 118.1                                                                             | 118.4                                                                             | 117.5                                                                               | 117.8                                                                               |
| aC <sub>2</sub> C <sub>3</sub>                | 116.1                                                                             | 120.6                                                                             | 120.3                                                                             | 122.2                                                                               | 119.9                                                                               |
| bC <sub>3</sub> C <sub>4</sub>                | 119.6                                                                             | 120.0                                                                             | 119.7                                                                             | 119.7                                                                               | 119.8                                                                               |
| cC <sub>4</sub> C <sub>5</sub>                | 120.9                                                                             | 120.5                                                                             | 121.2                                                                             | 120.5                                                                               | 121.1                                                                               |
| dC <sub>5</sub> C <sub>6</sub>                | 120.4                                                                             | 119.5                                                                             | 118.5                                                                             | 119.4                                                                               | 119.8                                                                               |
| eC <sub>6</sub> C <sub>1</sub>                | 119.0                                                                             | 118.1                                                                             | 118.4                                                                             | 119.2                                                                               | 117.8                                                                               |
| <b>Dihedral Angle (°)</b>                     |                                                                                   |                                                                                   |                                                                                   |                                                                                     |                                                                                     |
| aC <sub>2</sub> C <sub>3</sub> C <sub>4</sub> | 180.0                                                                             | -178.1                                                                            | -179.0                                                                            | 180.0                                                                               | 180.0                                                                               |
| cC <sub>4</sub> C <sub>3</sub> C <sub>2</sub> | 180.0                                                                             | 179.2                                                                             | -179.6                                                                            | 180.0                                                                               | 180.0                                                                               |
| cC <sub>4</sub> C <sub>5</sub> C <sub>6</sub> | 180.0                                                                             | 179.3                                                                             | 179.6                                                                             | 180.0                                                                               | 180.0                                                                               |
| eC <sub>6</sub> C <sub>5</sub> C <sub>4</sub> | 180.0                                                                             | -178.1                                                                            | 180.0                                                                             | -179.0                                                                              | -                                                                                   |

\* Individual Hydrogens have been designated letters a - e

S<sub>1</sub>=C=S<sub>2</sub>; State <sup>1</sup>A<sub>1</sub>, Symmetry C<sub>2v</sub>, Energy (Hartrees) -833.29923, Gibbs Free Energy -833.31965, S<sub>1</sub>=C 1.563Å, C=S<sub>2</sub> 1.563Å, S<sub>1</sub>=C=S<sub>2</sub> 179.7°

C=S; State <sup>1</sup>SG, Symmetry C<sub>sv</sub>, Energy (Hartrees) -435.5778, Gibbs Free Energy -435.59838, C=S 1.544Å

**Table 2**

**Reaction Pathway for the Collision Induced Dissociation of the Singlet  
PhCOS<sup>-</sup> Anion. Anion Geometries and Energies.  
Carbon-Sulfur-Oxygen Skeleton Only.**

Level of theory used - UCCSD(T)/6-31+G(d,p)//B3LYP/6-31+G(d,p).

Relative energies in kJ mol<sup>-1</sup> with respect to A (0 kJ mol<sup>-1</sup>).

|                                                             | 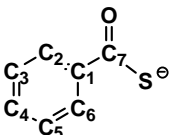 |  |  |  |  |  |
|-------------------------------------------------------------|-----------------------------------------------------------------------------------|-----------------------------------------------------------------------------------|-----------------------------------------------------------------------------------|------------------------------------------------------------------------------------|-------------------------------------------------------------------------------------|-------------------------------------------------------------------------------------|
|                                                             | A                                                                                 | TS A/B                                                                            | B                                                                                 | TS A/C                                                                             | C                                                                                   | D                                                                                   |
| <b>State</b>                                                | <sup>1</sup> A                                                                    | <sup>1</sup> A                                                                    | <sup>1</sup> A'                                                                   | <sup>1</sup> A                                                                     | <sup>1</sup> A'                                                                     | <sup>1</sup> A'                                                                     |
| <b>Symmetry</b>                                             | C <sub>1</sub>                                                                    | C <sub>1</sub>                                                                    | C <sub>s</sub>                                                                    | C <sub>1</sub>                                                                     | C <sub>s</sub>                                                                      | C <sub>s</sub>                                                                      |
| <b>Energy (Hartrees)</b>                                    | -741.66644                                                                        | -741.55247                                                                        | -628.60034 [-741.64111]                                                           | -741.55040                                                                         | -741.57485                                                                          | -305.97915 [-741.55695]                                                             |
| <b>Energy Relative to A</b>                                 | 0                                                                                 | +299                                                                              | +67 [B+CO]                                                                        | +305                                                                               | +241                                                                                | +288 [E+CS]                                                                         |
| <b>Gibbs Free Energy</b>                                    | -741.69969                                                                        | -741.58543                                                                        | -628.63016 [-741.69007]                                                           | -741.58300                                                                         | -741.60937                                                                          | -306.00803 [-741.60641]                                                             |
| <b>Free Energy Relative to A</b>                            | 0                                                                                 | +300                                                                              | +25 [B+CO]                                                                        | +306                                                                               | +237                                                                                | +245 [E+CS]                                                                         |
| <b>Bond Lengths (Å)</b>                                     |                                                                                   |                                                                                   |                                                                                   |                                                                                    |                                                                                     |                                                                                     |
| C <sub>1</sub> S                                            | -                                                                                 | 1.865                                                                             | 1.750                                                                             | -                                                                                  | -                                                                                   | -                                                                                   |
| C <sub>1</sub> C <sub>2</sub>                               | 1.403                                                                             | 1.427                                                                             | 1.424                                                                             | 1.443                                                                              | 1.407                                                                               | 1.448                                                                               |
| C <sub>1</sub> C <sub>7</sub>                               | 1.537                                                                             | 1.686                                                                             | -                                                                                 | 1.537                                                                              | -                                                                                   | -                                                                                   |
| C <sub>2</sub> C <sub>3</sub>                               | 1.398                                                                             | 1.401                                                                             | 1.395                                                                             | 1.389                                                                              | 1.395                                                                               | 1.392                                                                               |
| C <sub>3</sub> C <sub>4</sub>                               | 1.400                                                                             | 1.394                                                                             | 1.403                                                                             | 1.406                                                                              | 1.401                                                                               | 1.407                                                                               |
| C <sub>4</sub> C <sub>5</sub>                               | 1.399                                                                             | 1.415                                                                             | 1.403                                                                             | 1.406                                                                              | 1.400                                                                               | 1.407                                                                               |
| C <sub>5</sub> C <sub>6</sub>                               | 1.399                                                                             | 1.383                                                                             | 1.394                                                                             | 1.389                                                                              | 1.396                                                                               | 1.392                                                                               |
| C <sub>6</sub> C <sub>1</sub>                               | 1.405                                                                             | 1.437                                                                             | 1.424                                                                             | 1.442                                                                              | 1.408                                                                               | 1.449                                                                               |
| C <sub>7</sub> S                                            | 1.738                                                                             | 2.033                                                                             | -                                                                                 | 1.686                                                                              | 1.682                                                                               | -                                                                                   |
| C <sub>7</sub> O                                            | 1.244                                                                             | 1.187                                                                             | -                                                                                 | 1.342                                                                              | 1.434                                                                               | -                                                                                   |
| C <sub>1</sub> O                                            | -                                                                                 | -                                                                                 | -                                                                                 | 1.633                                                                              | 1.362                                                                               | 1.275                                                                               |
| <b>Bond Angles (°)</b>                                      |                                                                                   |                                                                                   |                                                                                   |                                                                                    |                                                                                     |                                                                                     |
| SC <sub>7</sub> O                                           | 125.7                                                                             | 127.0                                                                             | -                                                                                 | 111.3                                                                              | 109.0                                                                               | -                                                                                   |
| SC <sub>1</sub> C <sub>2</sub>                              | -                                                                                 | 118.5                                                                             | 122.4                                                                             | -                                                                                  | -                                                                                   | -                                                                                   |
| SC <sub>1</sub> C <sub>6</sub>                              | -                                                                                 | 119.8                                                                             | 122.3                                                                             | -                                                                                  | -                                                                                   | -                                                                                   |
| SC <sub>7</sub> C <sub>1</sub>                              | 118.4                                                                             | -                                                                                 | -                                                                                 | 180.0                                                                              | -                                                                                   | -                                                                                   |
| OC <sub>7</sub> C <sub>1</sub>                              | 115.9                                                                             | 143.1                                                                             | -                                                                                 | 68.7                                                                               | -                                                                                   | -                                                                                   |
| C <sub>1</sub> C <sub>2</sub> C <sub>3</sub>                | 120.9                                                                             | 121.9                                                                             | 122.3                                                                             | 120.6                                                                              | 120.5                                                                               | 122.6                                                                               |
| C <sub>2</sub> C <sub>3</sub> C <sub>4</sub>                | 120.4                                                                             | 121.2                                                                             | 121.0                                                                             | 122.2                                                                              | 120.6                                                                               | 121.7                                                                               |
| C <sub>3</sub> C <sub>4</sub> C <sub>5</sub>                | 119.3                                                                             | 118.0                                                                             | 118.0                                                                             | 117.4                                                                              | 118.7                                                                               | 117.5                                                                               |
| C <sub>4</sub> C <sub>5</sub> C <sub>6</sub>                | 120.2                                                                             | 121.3                                                                             | 121.0                                                                             | 122.2                                                                              | 121.5                                                                               | 121.7                                                                               |
| C <sub>5</sub> C <sub>6</sub> C <sub>1</sub>                | 121.1                                                                             | 122.0                                                                             | 122.3                                                                             | 120.6                                                                              | 119.6                                                                               | 122.6                                                                               |
| C <sub>6</sub> C <sub>1</sub> C <sub>2</sub>                | 118.2                                                                             | 115.3                                                                             | 115.3                                                                             | 116.0                                                                              | 119.1                                                                               | 113.9                                                                               |
| C <sub>7</sub> C <sub>1</sub> C <sub>2</sub>                | 123.4                                                                             | -                                                                                 | -                                                                                 | 120.9                                                                              | -                                                                                   | -                                                                                   |
| C <sub>7</sub> SC <sub>1</sub>                              | -                                                                                 | -                                                                                 | -                                                                                 | -                                                                                  | -                                                                                   | -                                                                                   |
| OC <sub>1</sub> C <sub>2</sub>                              | -                                                                                 | -                                                                                 | -                                                                                 | 115.4                                                                              | 115.9                                                                               | 123.1                                                                               |
| C <sub>7</sub> OC <sub>1</sub>                              | -                                                                                 | -                                                                                 | -                                                                                 | 61.3                                                                               | 118.5                                                                               | -                                                                                   |
| <b>Dihedral Angle (°)</b>                                   |                                                                                   |                                                                                   |                                                                                   |                                                                                    |                                                                                     |                                                                                     |
| C <sub>1</sub> C <sub>2</sub> C <sub>3</sub> C <sub>4</sub> | 0.0                                                                               | 2.8                                                                               | 0.0                                                                               | 5.2                                                                                | 0.0                                                                                 | 0.0                                                                                 |
| C <sub>2</sub> C <sub>3</sub> C <sub>4</sub> C <sub>5</sub> | 0.0                                                                               | 0.8                                                                               | -0.316                                                                            | 1.8                                                                                | 0.0                                                                                 | 0.0                                                                                 |
| OC <sub>1</sub> C <sub>2</sub> C <sub>3</sub>               | -                                                                                 | -                                                                                 | -                                                                                 | 127.8                                                                              | 180.0                                                                               | -179.0                                                                              |
| SC <sub>7</sub> OC <sub>1</sub>                             | -                                                                                 | -                                                                                 | -                                                                                 | 180.0                                                                              | -179.0                                                                              | -                                                                                   |

**Table 2(a)**

**Reaction Pathway for the Collision Induced Dissociation of the Singlet  
PhCOS<sup>-</sup> Anion. Anion Geometries and Energies.  
C-H Only.**

Level of theory used - UCCSD(T)/6-31+G(d,p)//B3LYP/6-31+G(d,p).

Relative energies in kJ mol<sup>-1</sup> with respect to A (0 kJ mol<sup>-1</sup>).

|                                               | 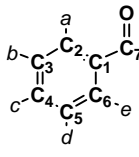 |  |  |  |  |  |
|-----------------------------------------------|-----------------------------------------------------------------------------------|-----------------------------------------------------------------------------------|-----------------------------------------------------------------------------------|------------------------------------------------------------------------------------|-------------------------------------------------------------------------------------|-------------------------------------------------------------------------------------|
|                                               | A                                                                                 | TS A/B                                                                            | B                                                                                 | TS A/D                                                                             | D                                                                                   | E                                                                                   |
| State                                         | <sup>1</sup> A                                                                    | <sup>1</sup> A                                                                    | <sup>1</sup> A'                                                                   | <sup>1</sup> A                                                                     | <sup>1</sup> A'                                                                     | <sup>1</sup> A'                                                                     |
| Symmetry                                      | C <sub>1</sub>                                                                    | C <sub>1</sub>                                                                    | C <sub>s</sub>                                                                    | C <sub>1</sub>                                                                     | C <sub>s</sub>                                                                      | C <sub>s</sub>                                                                      |
| Energy (Hartrees)                             | -741.66644                                                                        | -741.55247                                                                        | -628.60034 [-741.64111]                                                           | -741.55040                                                                         | -741.57485                                                                          | -305.97915 [-741.55695]                                                             |
| Energy Relative to A                          | 0                                                                                 | +299                                                                              | +67 [B+CO]                                                                        | +305                                                                               | +241                                                                                | +288 [E+CS]                                                                         |
| Gibbs Free Energy                             | -741.69969                                                                        | -741.58543                                                                        | -628.63016 [-741.69007]                                                           | -741.58300                                                                         | -741.60937                                                                          | -306.00803 [-741.60641]                                                             |
| Free Energy Relative to A                     | 0                                                                                 | +300                                                                              | +25 [B+CO]                                                                        | +306                                                                               | +237                                                                                | +245 [E+CS]                                                                         |
| <b>Bond Lengths (Å)</b>                       |                                                                                   |                                                                                   |                                                                                   |                                                                                    |                                                                                     |                                                                                     |
| C <sub>2</sub> a*                             | 1.086                                                                             | 1.087                                                                             | 1.087                                                                             | 1.085                                                                              | 1.085                                                                               | 1.089                                                                               |
| C <sub>3</sub> b                              | 1.088                                                                             | 1.090                                                                             | 1.090                                                                             | 1.091                                                                              | 1.089                                                                               | 1.092                                                                               |
| C <sub>4</sub> c                              | 1.088                                                                             | 1.088                                                                             | 1.088                                                                             | 1.086                                                                              | 1.087                                                                               | 1.087                                                                               |
| C <sub>5</sub> d                              | 1.089                                                                             | 1.090                                                                             | 1.090                                                                             | 1.090                                                                              | 1.089                                                                               | 1.092                                                                               |
| C <sub>6</sub> e                              | 1.085                                                                             | 1.086                                                                             | 1.087                                                                             | 1.086                                                                              | 1.082                                                                               | 1.089                                                                               |
| <b>Bond Angles (°)</b>                        |                                                                                   |                                                                                   |                                                                                   |                                                                                    |                                                                                     |                                                                                     |
| aC <sub>2</sub> C <sub>1</sub>                | 117.6                                                                             | 118.1                                                                             | 117.8                                                                             | 118.7                                                                              | 118.1                                                                               | 116.9                                                                               |
| aC <sub>2</sub> C <sub>3</sub>                | 121.5                                                                             | 119.9                                                                             | 119.9                                                                             | 120.6                                                                              | 121.4                                                                               | 120.5                                                                               |
| bC <sub>3</sub> C <sub>4</sub>                | 119.9                                                                             | 119.9                                                                             | 119.8                                                                             | 119.5                                                                              | 120.0                                                                               | 119.2                                                                               |
| cC <sub>4</sub> C <sub>5</sub>                | 120.3                                                                             | 120.8                                                                             | 121.1                                                                             | 121.3                                                                              | 120.7                                                                               | 121.3                                                                               |
| dC <sub>5</sub> C <sub>6</sub>                | 119.9                                                                             | 119.0                                                                             | 119.8                                                                             | 118.3                                                                              | 118.9                                                                               | 119.0                                                                               |
| eC <sub>6</sub> C <sub>1</sub>                | 117.5                                                                             | 117.9                                                                             | 117.8                                                                             | 118.7                                                                              | 117.9                                                                               | 116.9                                                                               |
| <b>Dihedral Angle (°)</b>                     |                                                                                   |                                                                                   |                                                                                   |                                                                                    |                                                                                     |                                                                                     |
| aC <sub>2</sub> C <sub>3</sub> C <sub>4</sub> | -179.0                                                                            | -178.0                                                                            | 180.0                                                                             | -178.4                                                                             | 180.0                                                                               | 180.0                                                                               |
| cC <sub>4</sub> C <sub>3</sub> C <sub>2</sub> | 180.0                                                                             | 178.3                                                                             | 180.0                                                                             | 179.1                                                                              | 180.0                                                                               | -179.0                                                                              |
| eC <sub>6</sub> C <sub>5</sub> C <sub>4</sub> | 180.0                                                                             | -178.9                                                                            | 180.0                                                                             | -179.0                                                                             | 180.0                                                                               | 180.0                                                                               |
| eC <sub>6</sub> C <sub>5</sub> C <sub>4</sub> | 180.0                                                                             | 178.5                                                                             | -                                                                                 | 178.3                                                                              | -179.0                                                                              | 180.0                                                                               |

\* Individual Hydrogens have been designated letters a - e

C=O; State <sup>1</sup>SG, Symmetry C<sub>∞v</sub>, Energy (Hartrees) -113.04077, Gibbs Free Energy -113.05991, C=O 1.138Å

C=S; State <sup>1</sup>SG, Symmetry C<sub>∞v</sub>, Energy (Hartrees) -435.57780, Gibbs Free Energy -435.59838, C=S 1.544Å

**Table 3**

**Possible Reaction Pathway for the CS<sub>2</sub> Addition to the Singlet Benzyl Anion. Anion Geometries and Energies. Carbon and Sulfur Skeleton Only.**

Level of theory used - UCCSD(T)/6-31+G(d,p)//B3LYP/6-31+G(d,p).

Relative energies in kJ mol<sup>-1</sup> with respect to A (0 kJ mol<sup>-1</sup>).

|                                                             | A              | B                           |
|-------------------------------------------------------------|----------------|-----------------------------|
|                                                             |                |                             |
| State                                                       | <sup>1</sup> A | <sup>1</sup> A'             |
| Symmetry                                                    | C <sub>1</sub> | C <sub>1</sub>              |
| Energy (Hartrees)                                           | -1103.43726    | -704.55370 [-1103.37578]    |
| Energy Relative to A                                        | 0              | +161 [B+H <sub>2</sub> S]   |
| Gibbs Free Energy                                           | -1103.47418    | -704.58712 [-1103.42847]    |
| Free Energy Relative to A                                   | 0              | +120 [ B+H <sub>2</sub> S ] |
| <b>Bond Lengths (Å)</b>                                     |                |                             |
| C <sub>1</sub> S <sub>1</sub>                               | 1.699          | 1.656                       |
| C <sub>1</sub> S <sub>2</sub>                               | 1.700          | -                           |
| C <sub>1</sub> C <sub>2</sub>                               | 1.549          | 1.240                       |
| C <sub>2</sub> C <sub>3</sub>                               | 1.516          | 1.409                       |
| C <sub>3</sub> C <sub>4</sub>                               | 1.404          | 1.425                       |
| C <sub>4</sub> C <sub>5</sub>                               | 1.397          | 1.393                       |
| C <sub>5</sub> C <sub>6</sub>                               | 1.399          | 1.402                       |
| C <sub>6</sub> C <sub>7</sub>                               | 1.399          | 1.403                       |
| C <sub>7</sub> C <sub>8</sub>                               | 1.398          | 1.393                       |
| C <sub>8</sub> C <sub>3</sub>                               | 1.404          | 1.425                       |
| <b>Bond Angles (°)</b>                                      |                |                             |
| S <sub>1</sub> C <sub>1</sub> S <sub>2</sub>                | 127.3          | -                           |
| S <sub>1</sub> C <sub>1</sub> C <sub>2</sub>                | 116.4          | 180.0                       |
| S <sub>2</sub> C <sub>1</sub> C <sub>2</sub>                | 116.3          | -                           |
| C <sub>1</sub> C <sub>2</sub> C <sub>3</sub>                | 112.9          | 180.0                       |
| C <sub>2</sub> C <sub>3</sub> C <sub>4</sub>                | 121.0          | 121.9                       |
| C <sub>3</sub> C <sub>4</sub> C <sub>5</sub>                | 121.0          | 121.7                       |
| C <sub>4</sub> C <sub>5</sub> C <sub>6</sub>                | 120.3          | 121.0                       |
| C <sub>5</sub> C <sub>6</sub> C <sub>7</sub>                | 119.3          | 118.4                       |
| C <sub>6</sub> C <sub>7</sub> C <sub>8</sub>                | 120.3          | 121.0                       |
| C <sub>7</sub> C <sub>8</sub> C <sub>3</sub>                | 121.0          | 121.7                       |
| C <sub>8</sub> C <sub>3</sub> C <sub>2</sub>                | 120.9          | 121.9                       |
| C <sub>8</sub> C <sub>3</sub> C <sub>4</sub>                | 118.2          | 116.2                       |
| <b>Dihedral Angle (°)</b>                                   |                |                             |
| C <sub>1</sub> C <sub>2</sub> C <sub>3</sub> C <sub>4</sub> | 89.7           | 0.0                         |
| S <sub>1</sub> C <sub>1</sub> C <sub>2</sub> C <sub>3</sub> | -89.6          | 180.0                       |
| C <sub>1</sub> C <sub>2</sub> C <sub>3</sub> C <sub>8</sub> | -89.8          | 0.0                         |
| C <sub>2</sub> C <sub>3</sub> C <sub>4</sub> C <sub>5</sub> | -179.7         | -179.0                      |

**Table 3(a)**

**Possible Reaction Pathway for the CS<sub>2</sub> Addition to the Singlet Benzyl Anion. Anion Geometries and Energies.**

**C-H Only.**

Level of theory used - UCCSD(T)/6-31+G(d,p)//B3LYP/6-31+G(d,p).

Relative energies in kJ mol<sup>-1</sup> with respect to A (0 kJ mol<sup>-1</sup>).

|                                               | A              | B                                   |
|-----------------------------------------------|----------------|-------------------------------------|
|                                               |                |                                     |
| <b>State</b>                                  | <sup>1</sup> A | <sup>1</sup> A'                     |
| <b>Symmetry</b>                               | C <sub>1</sub> | C <sub>1</sub>                      |
| <b>Energy (Hartrees)</b>                      | -1103.43726    | -704.55370 [-1103.37578]            |
| <b>Energy Relative to A</b>                   | 0              | +161 [ <b>B</b> +H <sub>2</sub> S ] |
| <b>Gibbs Free Energy</b>                      | -1103.47418    | -704.58712 [-1103.42847]            |
| <b>Free Energy Relative to A</b>              | 0              | +120 [ <b>B</b> +H <sub>2</sub> S ] |
| <b>Bond Lengths (Å)</b>                       |                |                                     |
| C <sub>2</sub> a                              | 1.095          | -                                   |
| C <sub>2</sub> b                              | 1.094          | -                                   |
| C <sub>4</sub> a                              | -              | 1.087                               |
| C <sub>4</sub> c                              | 1.087          | -                                   |
| C <sub>8</sub> b                              | -              | 1.086                               |
| C <sub>8</sub> d                              | 1.086          | -                                   |
| <b>Bond Angles (°)</b>                        |                |                                     |
| aC <sub>2</sub> b                             | 108.9          | -                                   |
| aC <sub>2</sub> C <sub>1</sub>                | 108.4          | -                                   |
| aC <sub>2</sub> C <sub>3</sub>                | 109.0          | -                                   |
| aC <sub>4</sub> C <sub>3</sub>                | -              | 118.1                               |
| bC <sub>2</sub> C <sub>1</sub>                | 108.5          | -                                   |
| bC <sub>2</sub> C <sub>3</sub>                | 109.0          | -                                   |
| bC <sub>8</sub> C <sub>3</sub>                | -              | 118.2                               |
| cC <sub>4</sub> C <sub>3</sub>                | 118.7          | -                                   |
| dC <sub>8</sub> C <sub>3</sub>                | 118.7          | -                                   |
| <b>Dihedral Angle (°)</b>                     |                |                                     |
| aC <sub>4</sub> C <sub>3</sub> C <sub>8</sub> | -              | 180.0                               |
| bC <sub>2</sub> C <sub>3</sub> C <sub>8</sub> | 30.9           | -                                   |
| dC <sub>8</sub> C <sub>3</sub> C <sub>4</sub> | -178.4         | -                                   |

H<sub>1</sub>-S-H<sub>2</sub>;

State <sup>1</sup>A', Symmetry C<sub>s</sub>, Energy (Hartrees) -398.82208, Gibbs Free Energy -398.84135, H<sub>1</sub>-S 1.348 Å, H<sub>2</sub>-S 1.348 Å, Angle H<sub>1</sub>-S-H<sub>2</sub> 92.7°

**Table 4**

**Reaction Pathway for the Interconversion of the Singlet  
 Anion  $\sigma\text{-CH}_3(\text{C}_6\text{H}_4)^-$  to Singlet  $\text{PhCH}_2^-$ .**

**Anion Geometries and Energies.**

**Carbon Skeleton Only.**

Level of theory used - UCCSD(T)/6-31+G(d,p)//B3LYP/6-31+G(d,p).

Relative energies in  $\text{kJ mol}^{-1}$  with respect to A ( $0 \text{ kJ mol}^{-1}$ ).

|                           | 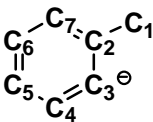 |  |  |
|---------------------------|-----------------------------------------------------------------------------------|------------------------------------------------------------------------------------|-------------------------------------------------------------------------------------|
|                           | A                                                                                 | TS A/B                                                                             | B                                                                                   |
| State                     | $^1A'$                                                                            | $^1A$                                                                              | $^1A$                                                                               |
| Symmetry                  | $C_s$                                                                             | $C_1$                                                                              | $C_1$                                                                               |
| Energy (Hartrees)         | -270.03120                                                                        | -269.96265                                                                         | -270.05125                                                                          |
| Energy Relative to A      | 0                                                                                 | +180                                                                               | -53                                                                                 |
| Gibbs Free Energy         | -270.06021                                                                        | -269.99218                                                                         | -270.08051                                                                          |
| Free Energy Relative to A | 0                                                                                 | +179                                                                               | -53                                                                                 |
| <b>Bond Lengths (Å)</b>   |                                                                                   |                                                                                    |                                                                                     |
| $C_1C_2$                  | 1.526                                                                             | 1.509                                                                              | 1.395                                                                               |
| $C_2C_3$                  | 1.422                                                                             | 1.423                                                                              | 1.451                                                                               |
| $C_3C_4$                  | 1.420                                                                             | 1.404                                                                              | 1.386                                                                               |
| $C_4C_5$                  | 1.405                                                                             | 1.412                                                                              | 1.412                                                                               |
| $C_5C_6$                  | 1.401                                                                             | 1.399                                                                              | 1.413                                                                               |
| $C_6C_7$                  | 1.401                                                                             | 1.408                                                                              | 1.386                                                                               |
| $C_7C_2$                  | 1.409                                                                             | 1.403                                                                              | 1.450                                                                               |
| <b>Bond Angles (°)</b>    |                                                                                   |                                                                                    |                                                                                     |
| $C_1C_2C_3$               | 119.3                                                                             | 105.3                                                                              | 123.2                                                                               |
| $C_2C_3C_4$               | 113.3                                                                             | 118.5                                                                              | 122.8                                                                               |
| $C_3C_4C_5$               | 124.9                                                                             | 120.6                                                                              | 122.1                                                                               |
| $C_4C_5C_6$               | 119.4                                                                             | 120.0                                                                              | 116.7                                                                               |
| $C_5C_6C_7$               | 118.5                                                                             | 120.4                                                                              | 122.1                                                                               |
| $C_6C_7C_2$               | 120.8                                                                             | 119.3                                                                              | 122.8                                                                               |
| $C_7C_2C_1$               | 117.5                                                                             | 133.5                                                                              | 123.2                                                                               |
| $C_7C_2C_3$               | 123.2                                                                             | 121.1                                                                              | 113.6                                                                               |
| <b>Dihedral Angle (°)</b> |                                                                                   |                                                                                    |                                                                                     |
| $C_1C_2C_3C_4$            | -179.0                                                                            | 178.7                                                                              | -179.0                                                                              |
| $C_1C_2C_7C_6$            | 180.0                                                                             | -175.4                                                                             | 180.0                                                                               |
| $C_2C_3C_4C_5$            | 0.0                                                                               | -3.0                                                                               | 0.0                                                                                 |
| $C_2C_7C_6C_5$            | 0.0                                                                               | -1.7                                                                               | 0.0                                                                                 |



## Table 4(a)

### Reaction Pathway for the Interconversion of the Singlet

### Anion $\sigma\text{-CH}_3(\text{C}_6\text{H}_4)^-$ to Singlet $\text{PhCH}_2^-$ .

### Anion Geometries and Energies.

### C-H Only.

Level of theory used - UCCSD(T)/6-31+G(d,p)//B3LYP/6-31+G(d,p).

Relative energies in  $\text{kJ mol}^{-1}$  with respect to A ( $0 \text{ kJ mol}^{-1}$ ).

|                           | 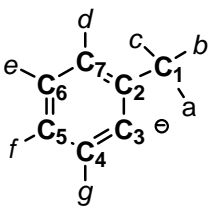 |  |  |
|---------------------------|-----------------------------------------------------------------------------------|------------------------------------------------------------------------------------|-------------------------------------------------------------------------------------|
|                           | A                                                                                 | TS A/B                                                                             | B                                                                                   |
| State                     | $^1A'$                                                                            | $^1A$                                                                              | $^1A$                                                                               |
| Symmetry                  | $C_s$                                                                             | $C_1$                                                                              | $C_1$                                                                               |
| Energy (Hartrees)         | -270.03120                                                                        | -269.96265                                                                         | -270.05125                                                                          |
| Energy Relative to A      | 0                                                                                 | +180                                                                               | -53                                                                                 |
| Gibbs Free Energy         | -270.06021                                                                        | -269.99218                                                                         | -270.08051                                                                          |
| Free Energy Relative to A | 0                                                                                 | +179                                                                               | -53                                                                                 |
| <b>Bond Lengths (Å)</b>   |                                                                                   |                                                                                    |                                                                                     |
| $C_1a$                    | 1.102                                                                             | 1.537                                                                              | -                                                                                   |
| $C_1b$                    | 1.102                                                                             | 1.105                                                                              | 1.087                                                                               |
| $C_1c$                    | 1.093                                                                             | 1.104                                                                              | 1.087                                                                               |
| $C_3a$                    | -                                                                                 | 1.421                                                                              | 1.090                                                                               |
| $C_4g$                    | 1.097                                                                             | 1.093                                                                              | 1.091                                                                               |
| $C_5f$                    | 1.094                                                                             | 1.092                                                                              | 1.087                                                                               |
| $C_6e$                    | 1.090                                                                             | 1.091                                                                              | 1.092                                                                               |
| $C_7d$                    | 1.095                                                                             | 1.091                                                                              | 1.090                                                                               |
| <b>Bond Angles (°)</b>    |                                                                                   |                                                                                    |                                                                                     |
| $aC_1C_2$                 | 112.2                                                                             | 72.2                                                                               | -                                                                                   |
| $aC_1b$                   | 106.7                                                                             | 132.2                                                                              | -                                                                                   |
| $aC_1c$                   | 108.3                                                                             | 110.4                                                                              | -                                                                                   |
| $bC_1C_2$                 | 112.2                                                                             | 115.5                                                                              | 121.3                                                                               |
| $bC_1c$                   | 108.3                                                                             | 108.6                                                                              | 117.5                                                                               |
| $cC_1C_2$                 | 108.9                                                                             | 113.0                                                                              | 121.2                                                                               |
| $dC_7C_6$                 | 118.8                                                                             | 119.5                                                                              | 119.2                                                                               |
| $eC_6C_5$                 | 121.0                                                                             | 119.7                                                                              | 119.3                                                                               |
| $fC_5C_4$                 | 120.8                                                                             | 120.4                                                                              | 121.6                                                                               |
| $gC_4C_3$                 | 118.8                                                                             | 120.9                                                                              | 118.6                                                                               |
| <b>Dihedral Angle (°)</b> |                                                                                   |                                                                                    |                                                                                     |
| $aC_1C_2C_3$              | -119.9                                                                            | -3.2                                                                               | -                                                                                   |
| $bC_1C_2C_3$              | 119.9                                                                             | -132.2                                                                             | -179.0                                                                              |

\* Individual Hydrogens have been designated letters a - g

**Table 5**  
**Reaction Pathway for the Interconversion of the Singlet Anion**  
**PhCH<sub>2</sub>CH<sub>2</sub><sup>-</sup>. Anion Geometries and Energies.**  
**Carbon Skeleton Only.**

Level of theory used - UCCSD(T)/6-31+G(d,p)//B3LYP/6-31+G(d,p).

Relative energies in kJ mol<sup>-1</sup> with respect to A (0 kJ mol<sup>-1</sup>).

|                                                             | 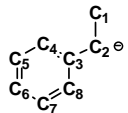 |  |  |  |  |  |  |
|-------------------------------------------------------------|-----------------------------------------------------------------------------------|-----------------------------------------------------------------------------------|-----------------------------------------------------------------------------------|------------------------------------------------------------------------------------|-------------------------------------------------------------------------------------|-------------------------------------------------------------------------------------|-------------------------------------------------------------------------------------|
|                                                             | D                                                                                 | C                                                                                 | TS A/D                                                                            | TS A/C                                                                             | A                                                                                   | TS A/B                                                                              | B                                                                                   |
| State                                                       | <sup>1</sup> A                                                                    | <sup>1</sup> A                                                                    | <sup>1</sup> A                                                                    | <sup>1</sup> A                                                                     | <sup>1</sup> A                                                                      | <sup>1</sup> A                                                                      | <sup>1</sup> A                                                                      |
| Symmetry                                                    | C <sub>1</sub>                                                                    | C <sub>1</sub>                                                                    | C <sub>1</sub>                                                                    | C <sub>1</sub>                                                                     | C <sub>1</sub>                                                                      | C <sub>1</sub>                                                                      | C <sub>1</sub>                                                                      |
| Energy (Hartrees)                                           | -309.22336                                                                        | -309.20572                                                                        | -309.12837                                                                        | -309.16471                                                                         | -309.18370                                                                          | -309.17008                                                                          | -309.17799                                                                          |
| Energy Relative to A                                        | -104                                                                              | -58                                                                               | +144                                                                              | +50                                                                                | 0                                                                                   | +36                                                                                 | +13                                                                                 |
| Gibbs Free Energy                                           | -309.25480                                                                        | -309.23759                                                                        | -309.15998                                                                        | -309.19645                                                                         | -309.21513                                                                          | -309.20086                                                                          | -309.20928                                                                          |
| Free Energy Relative to A                                   | -104                                                                              | -59                                                                               | +145                                                                              | +49                                                                                | 0                                                                                   | +38                                                                                 | +15                                                                                 |
| <b>Bond Lengths (Å)</b>                                     |                                                                                   |                                                                                   |                                                                                   |                                                                                    |                                                                                     |                                                                                     |                                                                                     |
| C <sub>1</sub> C <sub>2</sub>                               | 1.504                                                                             | 1.539                                                                             | 1.564                                                                             | 1.534                                                                              | 1.514                                                                               | 1.503                                                                               | 1.519                                                                               |
| C <sub>2</sub> C <sub>3</sub>                               | 1.392                                                                             | 1.525                                                                             | 1.430                                                                             | 1.555                                                                              | 1.529                                                                               | 1.475                                                                               | 1.517                                                                               |
| C <sub>1</sub> C <sub>3</sub>                               | -                                                                                 | -                                                                                 | -                                                                                 | -                                                                                  | -                                                                                   | 1.902                                                                               | 1.555                                                                               |
| C <sub>3</sub> C <sub>4</sub>                               | 1.453                                                                             | 1.408                                                                             | 1.433                                                                             | 1.399                                                                              | 1.404                                                                               | 1.458                                                                               | 1.499                                                                               |
| C <sub>4</sub> C <sub>5</sub>                               | 1.390                                                                             | 1.403                                                                             | 1.386                                                                             | 1.403                                                                              | 1.399                                                                               | 1.384                                                                               | 1.379                                                                               |
| C <sub>5</sub> C <sub>6</sub>                               | 1.407                                                                             | 1.398                                                                             | 1.414                                                                             | 1.402                                                                              | 1.402                                                                               | 1.415                                                                               | 1.420                                                                               |
| C <sub>6</sub> C <sub>7</sub>                               | 1.417                                                                             | 1.408                                                                             | 1.402                                                                             | 1.406                                                                              | 1.399                                                                               | 1.415                                                                               | 1.420                                                                               |
| C <sub>7</sub> C <sub>8</sub>                               | 1.383                                                                             | 1.416                                                                             | 1.396                                                                             | 1.402                                                                              | 1.402                                                                               | 1.383                                                                               | 1.378                                                                               |
| C <sub>8</sub> C <sub>3</sub>                               | 1.452                                                                             | 1.424                                                                             | 1.435                                                                             | 1.402                                                                              | 1.402                                                                               | 1.458                                                                               | 1.499                                                                               |
| <b>Bond Angles (°)</b>                                      |                                                                                   |                                                                                   |                                                                                   |                                                                                    |                                                                                     |                                                                                     |                                                                                     |
| C <sub>1</sub> C <sub>2</sub> C <sub>3</sub>                | 123.3                                                                             | 112.6                                                                             | 123.7                                                                             | 109.3                                                                              | 116.2                                                                               | 79.4                                                                                | 61.6                                                                                |
| C <sub>2</sub> C <sub>3</sub> C <sub>4</sub>                | 123.4                                                                             | 118.2                                                                             | 121.8                                                                             | 124.4                                                                              | 121.0                                                                               | 121.7                                                                               | 119.2                                                                               |
| C <sub>3</sub> C <sub>4</sub> C <sub>5</sub>                | 122.3                                                                             | 120.6                                                                             | 122.4                                                                             | 119.8                                                                              | 121.6                                                                               | 121.0                                                                               | 121.3                                                                               |
| C <sub>4</sub> C <sub>5</sub> C <sub>6</sub>                | 122.3                                                                             | 118.4                                                                             | 121.1                                                                             | 119.6                                                                              | 119.9                                                                               | 122.0                                                                               | 123.1                                                                               |
| C <sub>5</sub> C <sub>6</sub> C <sub>7</sub>                | 116.9                                                                             | 119.6                                                                             | 117.7                                                                             | 119.6                                                                              | 119.1                                                                               | 117.1                                                                               | 116.6                                                                               |
| C <sub>6</sub> C <sub>7</sub> C <sub>8</sub>                | 121.9                                                                             | 124.7                                                                             | 121.9                                                                             | 121.6                                                                              | 120.5                                                                               | 122.0                                                                               | 123.1                                                                               |
| C <sub>7</sub> C <sub>8</sub> C <sub>3</sub>                | 122.8                                                                             | 113.4                                                                             | 121.4                                                                             | 117.8                                                                              | 121.0                                                                               | 121.0                                                                               | 121.3                                                                               |
| C <sub>8</sub> C <sub>3</sub> C <sub>2</sub>                | 122.8                                                                             | 118.5                                                                             | 122.7                                                                             | 114.0                                                                              | 121.2                                                                               | 121.7                                                                               | 119.2                                                                               |
| C <sub>8</sub> C <sub>3</sub> C <sub>4</sub>                | 113.8                                                                             | 123.3                                                                             | 115.5                                                                             | 121.6                                                                              | 117.8                                                                               | 114.2                                                                               | 112.3                                                                               |
| <b>Dihedral Angle (°)</b>                                   |                                                                                   |                                                                                   |                                                                                   |                                                                                    |                                                                                     |                                                                                     |                                                                                     |
| C <sub>1</sub> C <sub>2</sub> C <sub>3</sub> C <sub>4</sub> | 0.0                                                                               | -105.2                                                                            | -173.7                                                                            | -179.0                                                                             | 177.4                                                                               | -99.5                                                                               | -108.0                                                                              |
| C <sub>1</sub> C <sub>2</sub> C <sub>3</sub> C <sub>8</sub> | 180.0                                                                             | 73.9                                                                              | 7.6                                                                               | 0.0                                                                                | -3.364                                                                              | 99.5                                                                                | 108.1                                                                               |
| C <sub>2</sub> C <sub>3</sub> C <sub>4</sub> C <sub>5</sub> | -179.0                                                                            | 178.8                                                                             | -177.3                                                                            | 180.0                                                                              | -179.2                                                                              | -179.0                                                                              | -162.2                                                                              |
| C <sub>2</sub> C <sub>3</sub> C <sub>8</sub> C <sub>7</sub> | 180.0                                                                             | -178.6                                                                            | 176.6                                                                             | -179.0                                                                             | -179.6                                                                              | 179.7                                                                               | 162.2                                                                               |

**Table 5(a)**  
**Reaction Pathway for the Interconversion of the Singlet Anion**  
**PhCH<sup>-</sup>CH<sub>3</sub>. Anion Geometries and Energies.**  
**C-H Only.**

Level of theory used - UCCSD(T)/6-31+G(d,p)//B3LYP/6-31+G(d,p).

Relative energies in kJ mol<sup>-1</sup> with respect to A (0 kJ mol<sup>-1</sup>).

|                                               | 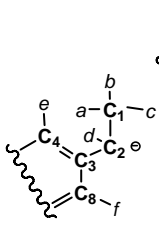 |  |  |  |  |  |  |
|-----------------------------------------------|-----------------------------------------------------------------------------------|-----------------------------------------------------------------------------------|-----------------------------------------------------------------------------------|------------------------------------------------------------------------------------|-------------------------------------------------------------------------------------|-------------------------------------------------------------------------------------|-------------------------------------------------------------------------------------|
|                                               | <b>D</b>                                                                          | <b>C</b>                                                                          | <b>TS A/D</b>                                                                     | <b>TS A/C</b>                                                                      | <b>A</b>                                                                            | <b>TS A/B</b>                                                                       | <b>B</b>                                                                            |
| State                                         | <sup>1</sup> A                                                                    | <sup>1</sup> A                                                                    | <sup>1</sup> A                                                                    | <sup>1</sup> A                                                                     | <sup>1</sup> A                                                                      | <sup>1</sup> A                                                                      | <sup>1</sup> A                                                                      |
| Symmetry                                      | C <sub>1</sub>                                                                    | C <sub>1</sub>                                                                    | C <sub>1</sub>                                                                    | C <sub>1</sub>                                                                     | C <sub>1</sub>                                                                      | C <sub>1</sub>                                                                      | C <sub>1</sub>                                                                      |
| Energy (Hartrees)                             | -309.22336                                                                        | -309.20572                                                                        | -309.12837                                                                        | -309.16471                                                                         | -309.18370                                                                          | -309.17008                                                                          | -309.17799                                                                          |
| Energy Relative to A                          | -104                                                                              | -58                                                                               | +144                                                                              | +50                                                                                | 0                                                                                   | +36                                                                                 | +13                                                                                 |
| Gibbs Free Energy                             | -309.25480                                                                        | -309.23759                                                                        | -309.15998                                                                        | -309.19645                                                                         | -309.21513                                                                          | -309.20086                                                                          | -309.20928                                                                          |
| Free Energy Relative to A                     | -104                                                                              | -59                                                                               | +145                                                                              | +49                                                                                | 0                                                                                   | +38                                                                                 | +15                                                                                 |
| <b>Bond Lengths (Å)</b>                       |                                                                                   |                                                                                   |                                                                                   |                                                                                    |                                                                                     |                                                                                     |                                                                                     |
| C <sub>1</sub> a                              | 1.110                                                                             | 1.098                                                                             | 1.089                                                                             | 1.100                                                                              | 1.100                                                                               | 1.086                                                                               | 1.092                                                                               |
| C <sub>1</sub> b                              | 1.109                                                                             | 1.100                                                                             | 1.095                                                                             | 1.099                                                                              | 1.103                                                                               | 1.085                                                                               | 1.092                                                                               |
| C <sub>1</sub> c                              | 1.098                                                                             | 1.095                                                                             | 1.401                                                                             | -                                                                                  | -                                                                                   | -                                                                                   | -                                                                                   |
| C <sub>1</sub> f                              | -                                                                                 | -                                                                                 | -                                                                                 | 1.528                                                                              | -                                                                                   | -                                                                                   | -                                                                                   |
| C <sub>2</sub> c                              | -                                                                                 | -                                                                                 | 1.220                                                                             | 1.104                                                                              | 1.104                                                                               | 1.098                                                                               | 1.091                                                                               |
| C <sub>2</sub> d                              | 1.089                                                                             | 1.103                                                                             | 1.092                                                                             | 1.104                                                                              | 1.126                                                                               | 1.098                                                                               | 1.091                                                                               |
| C <sub>2</sub> e                              | -                                                                                 | 1.097                                                                             | -                                                                                 | -                                                                                  | -                                                                                   | -                                                                                   | -                                                                                   |
| C <sub>4</sub> e                              | 1.088                                                                             | -                                                                                 | 1.090                                                                             | 1.094                                                                              | 1.091                                                                               | 1.090                                                                               | 1.090                                                                               |
| C <sub>4</sub> f                              | -                                                                                 | 1.095                                                                             | -                                                                                 | -                                                                                  | -                                                                                   | -                                                                                   | -                                                                                   |
| C <sub>8</sub> f                              | 1.090                                                                             | -                                                                                 | 1.085                                                                             | 1.361                                                                              | 1.088                                                                               | 1.090                                                                               | 1.090                                                                               |
| <b>Bond Angles (°)</b>                        |                                                                                   |                                                                                   |                                                                                   |                                                                                    |                                                                                     |                                                                                     |                                                                                     |
| aC <sub>1</sub> b                             | 105.0                                                                             | 108.1                                                                             | 115.2                                                                             | 109.1                                                                              | 109.2                                                                               | 118.3                                                                               | 114.8                                                                               |
| aC <sub>1</sub> c                             | 106.4                                                                             | 107.9                                                                             | 112.5                                                                             | -                                                                                  | -                                                                                   | -                                                                                   | -                                                                                   |
| aC <sub>1</sub> C <sub>2</sub>                | 113.8                                                                             | 110.9                                                                             | 112.1                                                                             | 113.1                                                                              | 111.5                                                                               | 120.1                                                                               | 118.3                                                                               |
| bC <sub>1</sub> c                             | 106.4                                                                             | 108.9                                                                             | 131.5                                                                             | -                                                                                  | -                                                                                   | -                                                                                   | -                                                                                   |
| bC <sub>1</sub> C <sub>2</sub>                | 113.9                                                                             | 111.9                                                                             | 116.7                                                                             | 113.1                                                                              | 112.9                                                                               | 120.1                                                                               | 118.3                                                                               |
| cC <sub>1</sub> C <sub>2</sub>                | 110.8                                                                             | 108.9                                                                             | 48.2                                                                              | -                                                                                  | -                                                                                   | -                                                                                   | -                                                                                   |
| cC <sub>2</sub> C <sub>1</sub>                | -                                                                                 | -                                                                                 | 58.9                                                                              | 113.1                                                                              | -                                                                                   | 120.1                                                                               | -                                                                                   |
| cC <sub>2</sub> C <sub>3</sub>                | -                                                                                 | -                                                                                 | 112.2                                                                             | 108.0                                                                              | -                                                                                   | 113.9                                                                               | -                                                                                   |
| cC <sub>2</sub> d                             | -                                                                                 | -                                                                                 | 115.4                                                                             | 105.1                                                                              | 103.4                                                                               | 109.8                                                                               | 113.5                                                                               |
| dC <sub>2</sub> C <sub>1</sub>                | 117.8                                                                             | 109.2                                                                             | 116.6                                                                             | 113.2                                                                              | 117.4                                                                               | 116.8                                                                               | 118.4                                                                               |
| dC <sub>2</sub> C <sub>3</sub>                | 118.8                                                                             | 110.8                                                                             | 116.1                                                                             | 107.9                                                                              | 103.4                                                                               | 115.7                                                                               | 117.8                                                                               |
| eC <sub>2</sub> C <sub>3</sub>                | -                                                                                 | 108.3                                                                             | -                                                                                 | -                                                                                  | -                                                                                   | -                                                                                   | -                                                                                   |
| eC <sub>4</sub> C <sub>3</sub>                | 118.8                                                                             | -                                                                                 | 118.3                                                                             | 120.5                                                                              | 118.8                                                                               | 118.7                                                                               | 118.1                                                                               |
| fC <sub>8</sub> C <sub>3</sub>                | 117.9                                                                             | -                                                                                 | 119.0                                                                             | 95.3                                                                               | 116.6                                                                               | 118.7                                                                               | 118.1                                                                               |
| fC <sub>4</sub> C <sub>3</sub>                | -                                                                                 | 120.4                                                                             | -                                                                                 | -                                                                                  | -                                                                                   | -                                                                                   | -                                                                                   |
| <b>Dihedral Angle (°)</b>                     |                                                                                   |                                                                                   |                                                                                   |                                                                                    |                                                                                     |                                                                                     |                                                                                     |
| aC <sub>1</sub> C <sub>2</sub> C <sub>3</sub> | 60.2                                                                              | 63.0                                                                              | 161.6                                                                             | -117.7                                                                             | -166.0                                                                              | -97.0                                                                               | 106.9                                                                               |
| dC <sub>2</sub> C <sub>3</sub> C <sub>8</sub> | 0.0                                                                               | -163.5                                                                            | 165.4                                                                             | 123.5                                                                              | 126.7                                                                               | -145.7                                                                              | -1.0                                                                                |
| eC <sub>4</sub> C <sub>3</sub> C <sub>8</sub> | 180.0                                                                             | -                                                                                 | -178.6                                                                            | 180.0                                                                              | -179.0                                                                              | 166.8                                                                               | 166.9                                                                               |
| fC <sub>8</sub> C <sub>3</sub> C <sub>4</sub> | -179.0                                                                            | -                                                                                 | 178.6                                                                             | 180.0                                                                              | -178.0                                                                              | -166.8                                                                              | -166.9                                                                              |

**Table 6**

**Reaction Pathway for the Dissociation of the Singlet PhCH<sub>2</sub>CH<sub>2</sub>CS<sub>2</sub><sup>-</sup> Anion. Energies and Selected Geometries of Anion Minima and Transition States.**

Level of theory used – UCCSD(T)/6-31+G(d,p)//B3LYP/6-31+G(d,p). Relative energies in kJ mol<sup>-1</sup> with respect to A (0 kJ mol<sup>-1</sup>)

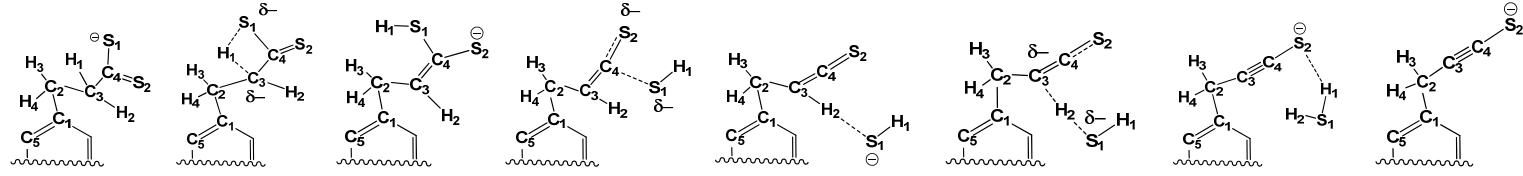

|                                 | A              | TS A/B         | B              | TS B/C         | C              | TS C/D         | D              | E                           |
|---------------------------------|----------------|----------------|----------------|----------------|----------------|----------------|----------------|-----------------------------|
| State                           | <sup>1</sup> A              |
| Symmetry                        | C <sub>1</sub>              |
| Energy (Hartree)                | -1142.61346    | -1142.52437    | -1142.58933    | -1142.54184    | -1142.55548    | -1142.54932    | -1142.55202    | -743.71570<br>[-1142.53778] |
| Energy Relative to A            | 0              | 234            | 63             | 188            | 152            | 168            | 161            | 199 [E+F]                   |
| Gibbs Free Energy (Hartree)     | -1142.64983    | -1142.56038    | -1142.62546    | -1142.58123    | -1142.59489    | -1142.58866    | -1142.59341    | -1142.591365                |
| Gibbs Free Energy Relative to A | 0              | 235            | 64             | 180            | 144            | 161            | 148            | 154 [E+F]                   |
| <b>Bond Length (Å)</b>          |                |                |                |                |                |                |                |                             |
| C <sub>1</sub> C <sub>2</sub>   | 1.511          | 1.519          | 1.520          | 1.526          | 1.521          | 1.524          | 1.532          | 1.532                       |
| C <sub>2</sub> C <sub>3</sub>   | 1.550          | 1.533          | 1.508          | 1.516          | 1.523          | 1.488          | 1.459          | 1.457                       |
| C <sub>3</sub> C <sub>4</sub>   | 1.535          | 1.452          | 1.363          | 1.317          | 1.297          | 1.258          | 1.230          | 1.233                       |
| C <sub>4</sub> S <sub>1</sub>   | 1.702          | 1.809          | 1.828          | 3.382          | —              | —              | —              | —                           |
| C <sub>4</sub> S <sub>2</sub>   | 1.703          | 1.679          | 1.739          | 1.586          | 1.596          | 1.639          | 1.678          | 1.674                       |
| C <sub>3</sub> H <sub>1</sub>   | 1.095          | 1.605          | —              | —              | —              | —              | —              | —                           |
| C <sub>3</sub> H <sub>2</sub>   | 1.095          | 1.097          | 1.090          | 1.091          | 1.137          | 1.626          | —              | —                           |
| S <sub>1</sub> H <sub>1</sub>   | 2.787          | 1.578          | 1.359          | 1.354          | 1.353          | 1.348          | 1.347          | —                           |
| S <sub>1</sub> H <sub>2</sub>   | —              | —              | —              | 2.643          | 2.246          | 1.498          | 1.397          | —                           |
| C <sub>2</sub> H <sub>3</sub>   | 1.096          | 1.105          | 1.101          | 1.100          | 1.097          | 1.102          | 1.104          | —                           |
| C <sub>2</sub> H <sub>4</sub>   | 1.096          | 1.098          | 1.099          | 1.098          | 1.095          | 1.100          | 1.104          | —                           |

**Table 6 Continued.**

| <b>Bond Angle (°)</b>                                       |        |        |        |        |        |        |       |        |
|-------------------------------------------------------------|--------|--------|--------|--------|--------|--------|-------|--------|
| <b>C<sub>1</sub>C<sub>2</sub>C<sub>3</sub></b>              | 113.0  | 113.9  | 114.2  | 115.3  | 113.8  | 113.6  | 116.4 | 116.4  |
| <b>C<sub>2</sub>C<sub>3</sub>C<sub>4</sub></b>              | 111.1  | 119.4  | 123.2  | 122.1  | 126.5  | 146.6  | 178.3 | 179.3  |
| <b>C<sub>3</sub>C<sub>4</sub>S<sub>1</sub></b>              | 116.4  | 105.6  | 118.6  | 79.5   | —      | —      | —     | —      |
| <b>C<sub>3</sub>C<sub>4</sub>S<sub>2</sub></b>              | 116.4  | 127.9  | 129.0  | 168.9  | 177.8  | 173.5  | 179.4 | 179.9  |
| <b>H<sub>1</sub>C<sub>3</sub>C<sub>4</sub></b>              | 109.6  | 73.8   | —      | —      | —      | —      | —     | —      |
| <b>H<sub>2</sub>C<sub>3</sub>C<sub>4</sub></b>              | 109.6  | 113.6  | 120.2  | 116.9  | 120.1  | 109.4  | 66.2  | —      |
| <b>H<sub>3</sub>C<sub>2</sub>C<sub>1</sub></b>              | 110.0  | 107.7  | 108.3  | 108.0  | 109.0  | 108.0  | 107.0 | 106.6  |
| <b>H<sub>4</sub>C<sub>2</sub>C<sub>1</sub></b>              | 110.0  | 108.9  | 108.8  | 108.5  | 109.2  | 108.7  | 107.0 | 106.6  |
| <b>Dihedral Angle (°)</b>                                   |        |        |        |        |        |        |       |        |
| <b>C<sub>3</sub>C<sub>2</sub>C<sub>1</sub>C<sub>5</sub></b> | -89.4  | -127.1 | -124.6 | -162.8 | 114.9  | 109.8  | 179.6 | 179.9  |
| <b>C<sub>4</sub>C<sub>3</sub>C<sub>2</sub>C<sub>1</sub></b> | 180.0  | -165.2 | -107.0 | -118.0 | 120.1  | -79.5  | —     | -141.9 |
| <b>S<sub>1</sub>C<sub>4</sub>C<sub>3</sub>C<sub>2</sub></b> | 88.9   | 71.2   | -179.5 | 175.7  | -177.0 | -179.6 | —     | —      |
| <b>S<sub>2</sub>C<sub>4</sub>C<sub>3</sub>C<sub>2</sub></b> | -88.8  | -117.8 | 0.9    | -3.4   | 175.1  | -177.4 | —     | 136.9  |
| <b>H<sub>1</sub>C<sub>3</sub>C<sub>4</sub>S<sub>1</sub></b> | -31.3  | -16.9  | -0.6   | -19.2  | 13.5   | 5.1    | -0.4  | —      |
| <b>H<sub>2</sub>C<sub>3</sub>C<sub>4</sub>S<sub>1</sub></b> | -150.8 | -155.8 | 1.6    | -4.6   | 1.5    | -0.4   | 3.5   | —      |
| <b>H<sub>3</sub>C<sub>2</sub>C<sub>1</sub>C<sub>5</sub></b> | 31.4   | -3.7   | -0.7   | -40.5  | -126.2 | -128.3 | -56.2 | -55.4  |
| <b>H<sub>4</sub>C<sub>2</sub>C<sub>1</sub>C<sub>5</sub></b> | 149.8  | 110.7  | 115.7  | 73.9   | -8.8   | -13.6  | 55.4  | 55.7   |

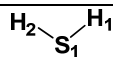

[F]; State <sup>1</sup>A', Symmetry C<sub>s</sub>, Energy (Hartree) -398.82208, Gibbs Free Energy (Hartree) -398.84201, H<sub>1</sub>S<sub>1</sub> 1.348 Å, H<sub>2</sub>S<sub>1</sub> 1.348 Å, ∠H<sub>1</sub>S<sub>1</sub>H<sub>2</sub> 92.7°.

**Table 7**  
**Energies and Selected Geometries of Stationary Points on the**  
**Potential Energy Surface of Dissociation of the Singlet**  
**PhCH<sub>2</sub>CH<sub>2</sub>CO<sub>2</sub><sup>-</sup> Anion.**

Level of theory used – UCCSD(T)/6-31+G(d,p)//B3LYP/6-31+G(d,p). Relative energies in kJ mol<sup>-1</sup> with respect to A (0 kJ mol<sup>-1</sup>)

|                                                                                                                                                                                                                                                                                                   | 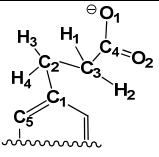 |  |
|---------------------------------------------------------------------------------------------------------------------------------------------------------------------------------------------------------------------------------------------------------------------------------------------------|-----------------------------------------------------------------------------------|-------------------------------------------------------------------------------------|
|                                                                                                                                                                                                                                                                                                   | <b>A</b>                                                                          | <b>B</b>                                                                            |
| State                                                                                                                                                                                                                                                                                             | <sup>1</sup> A                                                                    | <sup>1</sup> A                                                                      |
| Symmetry                                                                                                                                                                                                                                                                                          | C <sub>1</sub>                                                                    | C <sub>1</sub>                                                                      |
| Energy (Hartree)                                                                                                                                                                                                                                                                                  | -497.40907                                                                        | -309.18830 [ -497.31026 ]                                                           |
| Energy Relative to A                                                                                                                                                                                                                                                                              | 0                                                                                 | +259 [ B+C ]                                                                        |
| GibbsFree Energy (Hartree)                                                                                                                                                                                                                                                                        | -497.44402                                                                        | -309.21764 [ -497.35621 ]                                                           |
| GibbsFree Energy Relative to A                                                                                                                                                                                                                                                                    | 0                                                                                 | +231 [ B+C ]                                                                        |
| <b>Bond Length (Å)</b>                                                                                                                                                                                                                                                                            |                                                                                   |                                                                                     |
| C <sub>1</sub> C <sub>2</sub>                                                                                                                                                                                                                                                                     | 1.510                                                                             | 1.517                                                                               |
| C <sub>2</sub> C <sub>3</sub>                                                                                                                                                                                                                                                                     | 1.541                                                                             | 1.530                                                                               |
| C <sub>3</sub> C <sub>4</sub>                                                                                                                                                                                                                                                                     | 1.571                                                                             | —                                                                                   |
| C <sub>4</sub> O <sub>1</sub>                                                                                                                                                                                                                                                                     | 1.261                                                                             | —                                                                                   |
| C <sub>4</sub> O <sub>2</sub>                                                                                                                                                                                                                                                                     | 1.259                                                                             | —                                                                                   |
| C <sub>3</sub> H <sub>1</sub>                                                                                                                                                                                                                                                                     | 1.096                                                                             | 1.103                                                                               |
| C <sub>3</sub> H <sub>2</sub>                                                                                                                                                                                                                                                                     | 1.100                                                                             | 1.102                                                                               |
| C <sub>2</sub> H <sub>3</sub>                                                                                                                                                                                                                                                                     | 1.097                                                                             | 1.103                                                                               |
| C <sub>2</sub> H <sub>4</sub>                                                                                                                                                                                                                                                                     | 1.095                                                                             | 1.103                                                                               |
| <b>Bond Angle (°)</b>                                                                                                                                                                                                                                                                             |                                                                                   |                                                                                     |
| C <sub>1</sub> C <sub>2</sub> C <sub>3</sub>                                                                                                                                                                                                                                                      | 113.7                                                                             | 113.3                                                                               |
| C <sub>2</sub> C <sub>3</sub> C <sub>4</sub>                                                                                                                                                                                                                                                      | 113.8                                                                             | —                                                                                   |
| C <sub>3</sub> C <sub>4</sub> O <sub>1</sub>                                                                                                                                                                                                                                                      | 116.1                                                                             | —                                                                                   |
| C <sub>3</sub> C <sub>4</sub> O <sub>2</sub>                                                                                                                                                                                                                                                      | 114.8                                                                             | —                                                                                   |
| H <sub>1</sub> C <sub>3</sub> C <sub>2</sub>                                                                                                                                                                                                                                                      | 111.1                                                                             | 111.2                                                                               |
| H <sub>2</sub> C <sub>3</sub> C <sub>4</sub>                                                                                                                                                                                                                                                      | 107.0                                                                             | —                                                                                   |
| H <sub>3</sub> C <sub>2</sub> C <sub>1</sub>                                                                                                                                                                                                                                                      | 109.5                                                                             | 108.1                                                                               |
| H <sub>4</sub> C <sub>2</sub> C <sub>1</sub>                                                                                                                                                                                                                                                      | 110.9                                                                             | 108.1                                                                               |
| <b>Dihedral Angle (°)</b>                                                                                                                                                                                                                                                                         |                                                                                   |                                                                                     |
| C <sub>3</sub> C <sub>2</sub> C <sub>1</sub> C <sub>5</sub>                                                                                                                                                                                                                                       | -93.3                                                                             | -88.7                                                                               |
| C <sub>4</sub> C <sub>3</sub> C <sub>2</sub> C <sub>1</sub>                                                                                                                                                                                                                                       | -171.8                                                                            | —                                                                                   |
| O <sub>1</sub> C <sub>4</sub> C <sub>3</sub> C <sub>2</sub>                                                                                                                                                                                                                                       | 27.9                                                                              | —                                                                                   |
| O <sub>2</sub> C <sub>4</sub> C <sub>3</sub> C <sub>2</sub>                                                                                                                                                                                                                                       | -153.8                                                                            | —                                                                                   |
| H <sub>1</sub> C <sub>3</sub> C <sub>2</sub> O <sub>1</sub>                                                                                                                                                                                                                                       | 64.8                                                                              | 60.6                                                                                |
| H <sub>2</sub> C <sub>3</sub> C <sub>2</sub> O <sub>1</sub>                                                                                                                                                                                                                                       | -52.3                                                                             | -60.5                                                                               |
| H <sub>3</sub> C <sub>2</sub> C <sub>1</sub> C <sub>5</sub>                                                                                                                                                                                                                                       | 28.7                                                                              | 34.0                                                                                |
| H <sub>4</sub> C <sub>2</sub> C <sub>1</sub> C <sub>5</sub>                                                                                                                                                                                                                                       | 145.8                                                                             | 148.7                                                                               |
| <b>O<sub>1</sub>=C<sub>4</sub>=O<sub>2</sub> [C]; State <sup>1</sup>A', Symmetry C<sub>s</sub>, Energy (Hartree) -188.12196, Gibbs Free Energy (Hartree) -188.13857, O<sub>1</sub>C<sub>4</sub> 1.563 Å, O<sub>2</sub>C<sub>4</sub> 1.563 Å, ∠H<sub>1</sub>S<sub>1</sub>H<sub>2</sub> 180.0°.</b> |                                                                                   |                                                                                     |
